# Supplementary material for: Metagenome Analysis of a Hydrocarbon-Degrading Bacterial Consortium Reveals the Specific Roles of BTEX Biodegraders
Source: MDPI journal article supplement (doi:10.3390/genes12010098), 2021-01-14
Supplement: s1 [file s1]

# Metagenome analysis of a hydrocarbon-degrading bacterial consortium reveals the specific roles of BTEX biodegraders

Michael O. Eze<sup>1,2\*</sup>

<sup>1</sup>Department of Genomic and Applied Microbiology and Göttingen Genomics Laboratory, Georg-August University of Göttingen, 37077 Göttingen, Germany.

<sup>2</sup>Department of Earth and Environmental Sciences and MQ Marine Research Centre, Macquarie University, Sydney, NSW 2109, Australia.

\*Correspondence: meze@gwdg.de

## Supplementary Materials

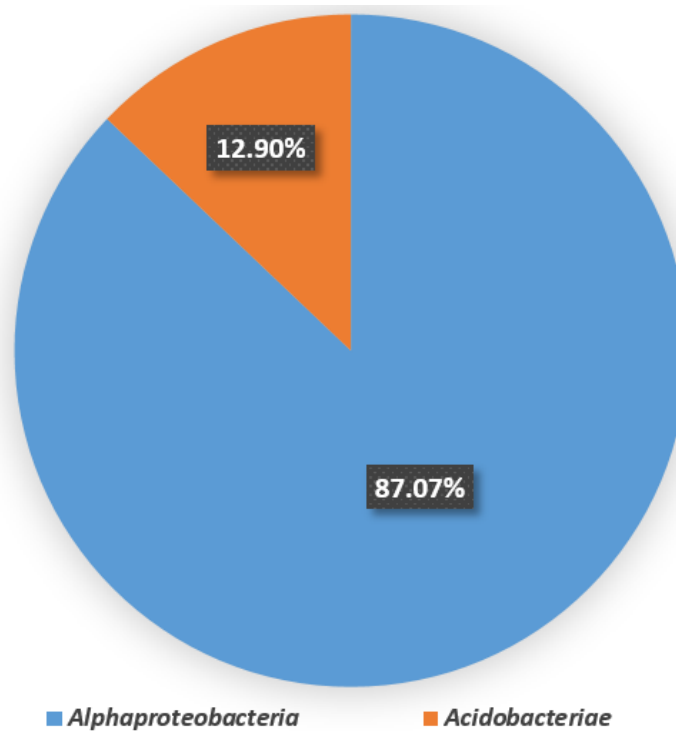

Figure S1. Taxonomic classification of the bacterial consortium at class level.

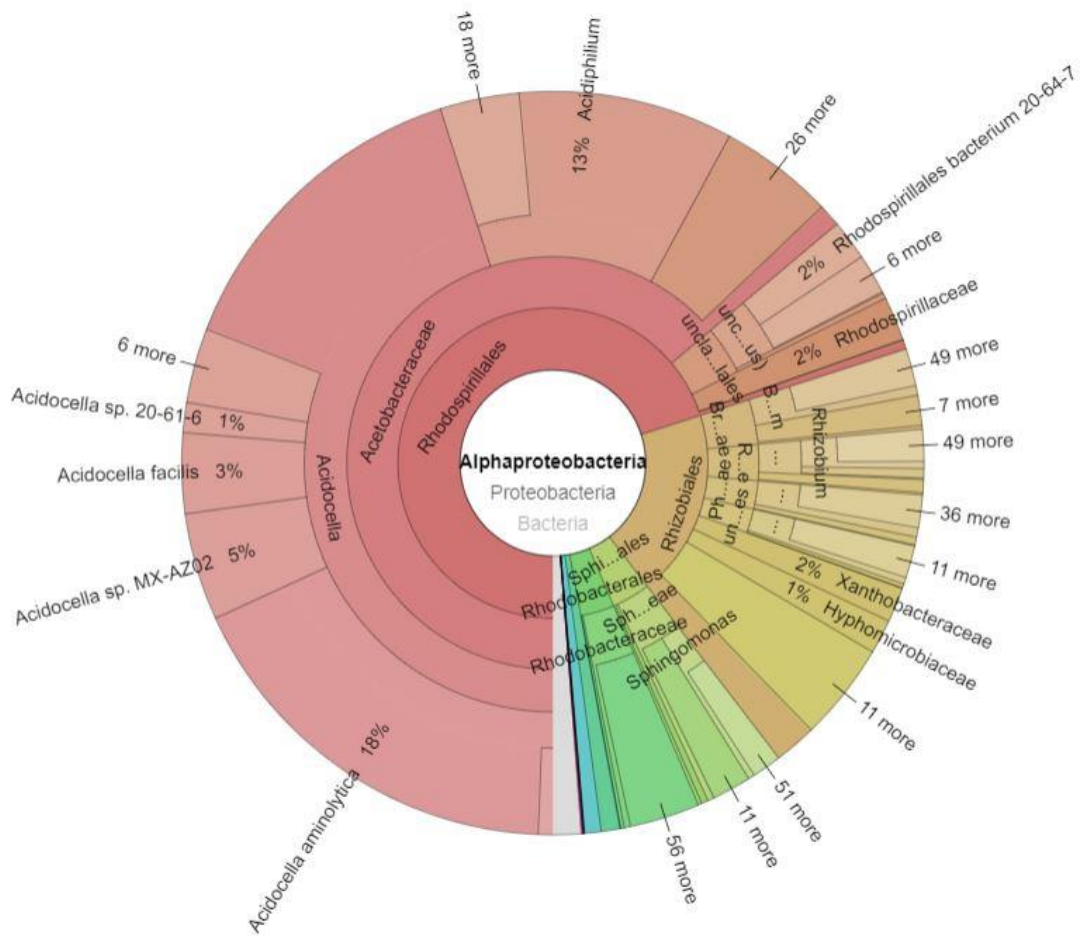

**Figure S2.** Taxonomic classification of Alphaproteobacteria at the genus level (“more” refers to additional taxa under the same genus).

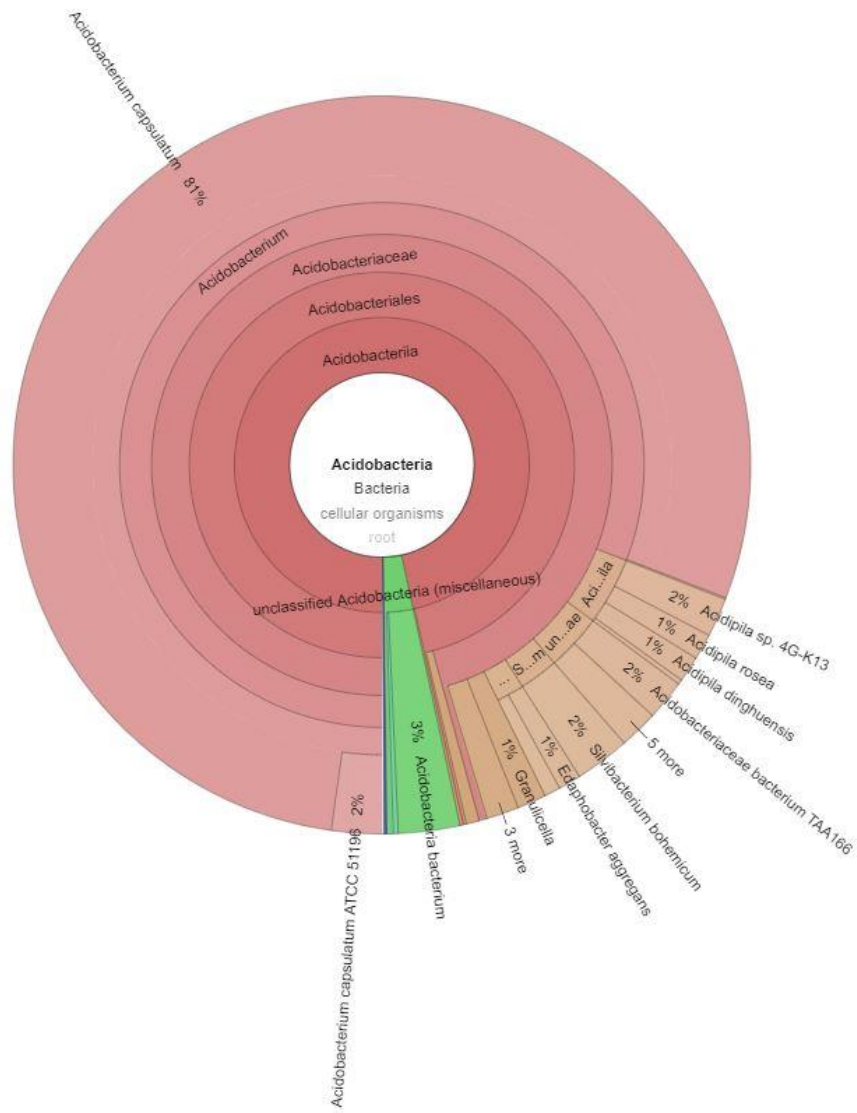

**Figure S3.** Taxonomic classification of Acidobacteria at the genus level ("more" refers to additional taxa under the same genus).

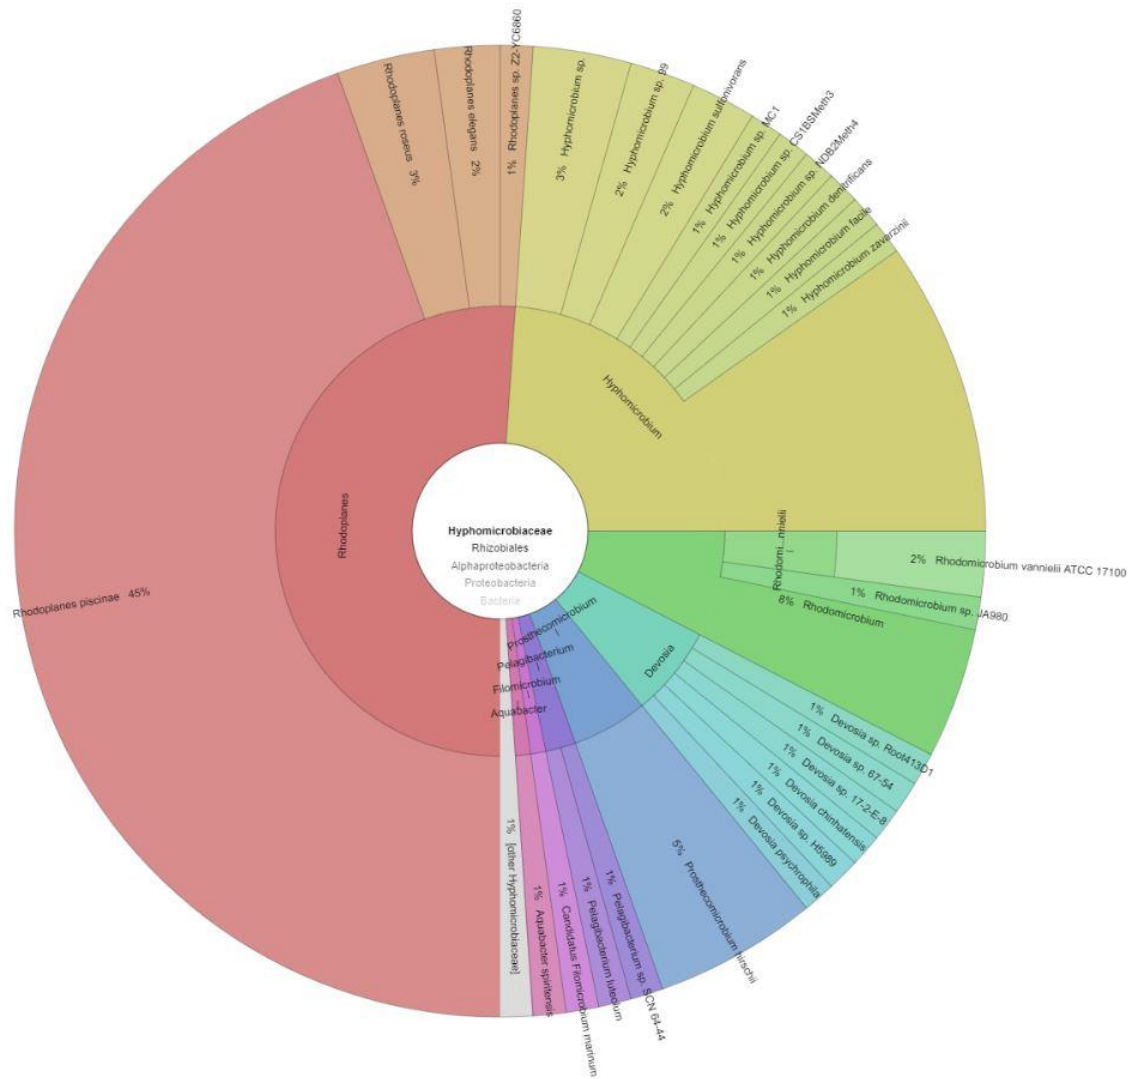

**Figure S4.** Taxonomic classification of *Hyphomicrobiaceae* showing *Aquabacter*.
